# Supplementary material for: Effects of Different Hamstring Eccentric Exercise Programs on Preventing Lower Extremity Injuries: A Systematic Review and Meta-Analysis
Source: MDPI journal article supplement (doi:10.3390/ijerph20032057), 2023-01-23
Supplement: s1 [file s1]

Table S1 Basic Information of the Included Studies

| study               | sport                           | sport level   | Location     | Sex         | Age         | Compliance ( % )   | Frequency per week | Period              | Injury type            | type of intervention group     |
|---------------------|---------------------------------|---------------|--------------|-------------|-------------|--------------------|--------------------|---------------------|------------------------|--------------------------------|
| Petersen.et al      | football                        | elite&amateur | Danish       | male        | 23, 23.5    | 91                 | >2                 | 10weeks             | hamstring injury       | NHE                            |
| Gabbe.et al         | football                        | amateur       | Australia    | male        | 23.4, 23.9  | 46.80              | <1                 | 12weeks             | hamstring injury       | NHE                            |
| Horst.et al         | football                        | amateur       | Netherland   | male        | 24.5, 24.6  | 91                 | ≈2                 | 13weeks             | hamstring injury       | NHE                            |
| Espinosa.et al      | football                        | elite         | Spain        | famale      | 21          | 80 (IG)<br>76 (CG) | 1                  | 21weeks             | hamstring injury       | comprehensive warmup(incl NHE) |
| Hasebe.et al        | football                        | youth         | Japan        | male        | 16.7/16.3   | 88                 | ≈1                 | 27weeks             | hamstring injury       | NHE                            |
| Askling.et al       | football                        | elite         | Sweden       | male        | 24/26       | NOT REPORT         | ≈2                 | 10weeks             | hamstring injury       | NHE                            |
| Soligard.et al      | football                        | youth         | Norway       | famale      | 13-17       | 77                 | >2                 | 1season             | lower extremity injury | warm-up exercise (incl NHE)    |
| Engbretsen.et al    | football                        | elite         | Norway       | male        | 17-35       | 21                 | >2                 | 10weeks             | lower extremity injury | Regular training and NHE       |
| Graneli.et al       | football                        | elite         | USA          | male        | 18-25       | 100                | 3                  | 1season ( 5months ) | the whole body         | FIFA 11+ (incl NHE)            |
| Beijsterveldt.et al | football                        | youth         | Netherland   | male        | 18-40       | 72                 | >2                 | 33 weeks            | the whole body         | FIFA 11 (incl NHE)             |
| Longo.et al         | Basketball                      | elite         | Italy        | male        | 11-21/12-24 | 100                | ≈1                 | 9months             | the whole body         | FIFA 11+ (incl NHE)            |
| Slauterbeck.et al   | football , basketball, lacrosse | youth         | New England  | Male female | NOT REPORT  | NOT REPORT         | 1                  | 1year               | lower extremity injury | FIFA 11+ (incl NHE)            |
| Steffen.et al       | football                        | youth         | norway       | female      | 13-17       | 52                 | 1                  | 5.5months           | the whole body         | FIFA                           |
| AI Attar.et al      | football                        | amateur       | Saudi Arabia | male        | 31.6        | NOT REPORT         | 2                  | 1season             | the whole body         | FIFA 11 +(incl NHE)            |
| Graneli.et al       | football                        | elite         | USA          | male        | 18-25       | 100                | 2-3                | 1season             | the whole body         | FIFA11+(inclNHE)               |
| Hammes.et al        | football                        | elite         | Germany      | male        | 45.2, 43.1  | 98                 | 1                  | 9months             | the whole body         | FIFA 11+                       |
| Nuhu.et al          | football                        | elite         | Rwanda       | male        | 19.9, 19.7  | 75                 | 3                  | 7months             | the whole body         | FIFA11+(inclNHE)               |
| Lopes.et al         | football                        | amateur       | Coimbra      | male        | 27.7, 25.8  | NOT REPORT         | 2                  | 20weeks             | the whole body         | FIFA11+(inclNHE)               |
| Owoeye.et al        | football                        | youth         | Nigeria      | male        | 14-19       | 60                 | >2                 | 6months             | the whole body         | FIFA11+(inclNHE)               |
| Sebelien et al      | Football                        | elite         | Norway       | male        | 18–39       | NOT REPORT         | 3                  | 1 season            | hamstring injury       | Warm up; NHE                   |
| Gilchrist.et al     | Football                        | elite         | USA          | female      | 19.88       | NOT REPORT         | 3                  | 12weeks             | ACL                    | INT(NHE)                       |
| Olsen.et al         | handball                        | elite         | Norway       | Male female | 15-17       | NOT REPORT         | >1                 | 8months             | the whole body         | warm up; NHE                   |
| Zarei.et al         | football                        | youth         | Iran         | male        | 7-14        | 100                | 2                  | 9months             | the whole body         | FIFA11+kids                    |

Abbreviations:NHE, Nordic hamstring exercise; IG, intervention group; CG, control group;ACL, Anterior cruciate ligament of knee
