# Supplementary material for: Effects of Different Hamstring Eccentric Exercise Programs on Preventing Lower Extremity Injuries: A Systematic Review and Meta-Analysis
Source: MDPI journal article supplement (doi:10.3390/ijerph20032057), 2023-01-23
Supplement: s1 [file s1]

## Hamstring Eccentric Exercise vs Normal warm-up training

**Patient or population:** Youth and Adults

**Settings:** Hamstring Eccentric Exercise compared to normal warm-up training in injury prevention

**Intervention:** Hamstring Eccentric Exercise

**Comparison:** Normal warm-up training

| Outcomes                                   | Illustrative comparative risks* (95% CI) |                              | Relative effect (95% CI)  | No of Participants (studies) | Quality of the evidence (GRADE)             |
|--------------------------------------------|------------------------------------------|------------------------------|---------------------------|------------------------------|---------------------------------------------|
|                                            | Assumed risk                             | Corresponding risk           |                           |                              |                                             |
|                                            | Normal warm-up training                  | Hamstring Eccentric Exercise |                           |                              |                                             |
| Lower Extremity<br>Follow-up: 10-52 weeks  | Study population                         |                              | RR 0.72<br>(0.60 to 0.85) | 14721<br>(15 studies)        | ⊕ ⊕ ⊕ ⊕<br><b>low</b> <sup>1,2,3</sup>      |
|                                            | 232 per 1000                             | 167 per 1000<br>(139 to 197) |                           |                              |                                             |
|                                            | Moderate                                 |                              |                           |                              |                                             |
| Hamstring Injury<br>Follow-up: 10-52 weeks | Study population                         |                              | RR 0.54<br>(0.38 to 0.77) | 6797<br>(13 studies)         | ⊕ ⊕ ⊕ ⊕<br><b>moderate</b> <sup>1,3,4</sup> |
|                                            | 67 per 1000                              | 36 per 1000<br>(26 to 52)    |                           |                              |                                             |
|                                            | Moderate                                 |                              |                           |                              |                                             |
| Hip/Groin Injury<br>Follow-up: 10-52 weeks | Study population                         |                              | RR 0.73<br>(0.58 to 0.91) | 10315<br>(10 studies)        | ⊕ ⊕ ⊕ ⊕<br><b>high</b> <sup>1,3</sup>       |
|                                            | 37 per 1000                              | 27 per 1000<br>(21 to 33)    |                           |                              |                                             |
|                                            | Moderate                                 |                              |                           |                              |                                             |
| Knee Injury<br>Follow-up: 10-52 weeks      | Study population                         |                              | RR 0.66<br>(0.52 to 0.84) | 13709<br>(17 studies)        | ⊕ ⊕ ⊕ ⊕<br><b>moderate</b> <sup>1,3,4</sup> |
|                                            | 73 per 1000                              | 48 per 1000<br>(38 to 62)    |                           |                              |                                             |
|                                            | Moderate                                 |                              |                           |                              |                                             |
| Ankle Injury<br>Follow-up: 10-52 weeks     | Study population                         |                              | RR 0.78<br>(0.65 to 0.93) | 16365<br>(16 studies)        | ⊕ ⊕ ⊕ ⊕<br><b>high</b> <sup>1,3</sup>       |
|                                            | 75 per 1000                              | 59 per 1000<br>(49 to 70)    |                           |                              |                                             |
|                                            | Moderate                                 |                              |                           |                              |                                             |

\*The basis for the **assumed risk** (e.g. the median control group risk across studies) is provided in footnotes. The **corresponding risk** (and its 95% confidence interval) is based on the assumed risk in the comparison group and the **relative effect** of the intervention (and its 95% CI).

**CI:** Confidence interval; **RR:** Risk ratio;

GRADE Working Group grades of evidence

**High quality:** Further research is very unlikely to change our confidence in the estimate of effect.

**Moderate quality:** Further research is likely to have an important impact on our confidence in the estimate of effect and may change the estimate.

**Low quality:** Further research is very likely to have an important impact on our confidence in the estimate of effect and is likely to change the estimate.

**Very low quality:** We are very uncertain about the estimate.

<sup>1</sup> There was no blinding for participants and personnel in some included studies

<sup>2</sup> There was high heterogeneity between studies  $I^2 = 75\%$

<sup>3</sup> Study demonstrated significant intervention efficacy and consistent results

<sup>4</sup> There was heterogeneity between studies  $I^2 = 50\%$  and  $I^2 = 75\%$
